# Supplementary material
Source: PubMed Central journal article supplement (PMC2629304)
Supplement: 0803375105_0803375105SI.pdf [file 0803375105_0803375105SI.pdf]

# Supporting Information

van der Werf *et al.* 10.1073/pnas.0803375105

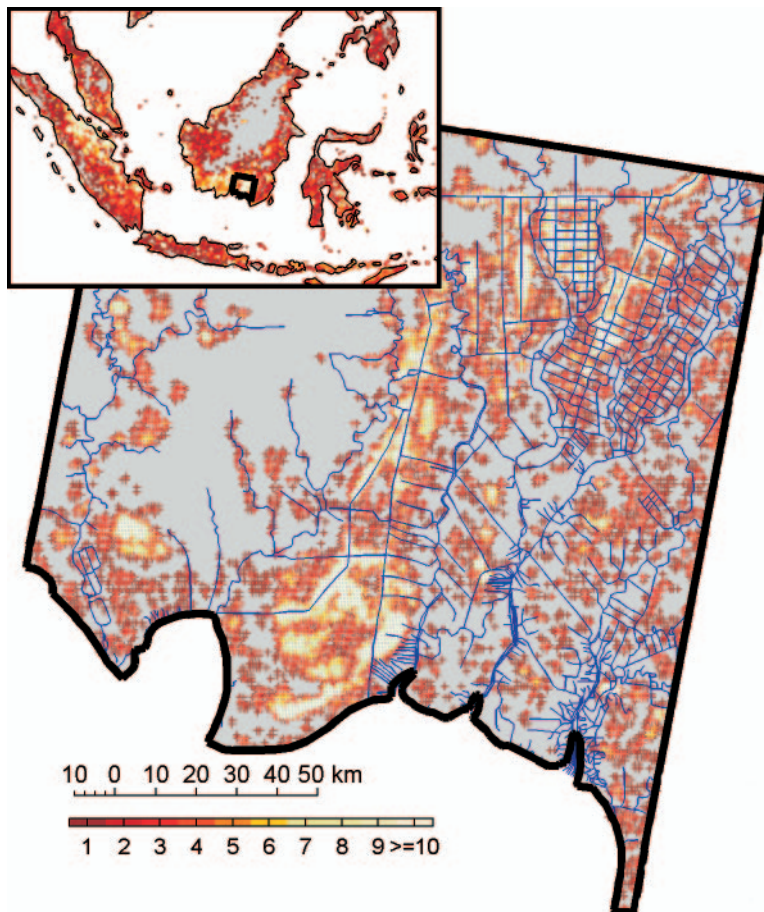

**Fig. S1.** Fire locations (number of detected fires during 2000–2006) superimposed on a drainage map (blue). Note how most fires occur along drainage canal banks or are concentrated in new deforestation zones (for example, the southern peninsula). The inset shows the location of the study region within Borneo, corresponding to Landsat scene path 118 row 062. Canals and rivers were digitized by hand to derive mean distance to these waterways for each year on the basis of Terra-MODIS active fires (Table 1).

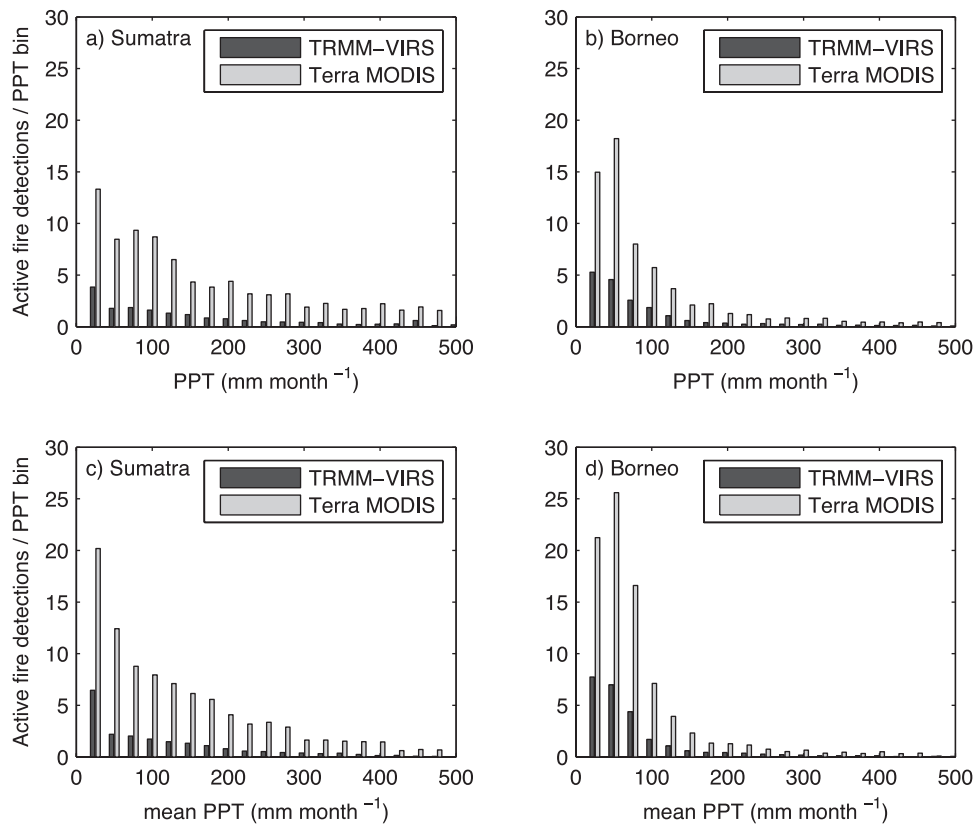

**Fig. S2.** Average number of TRMM-VIRS (37) (1998–2006) and Terra-MODIS (20) (2000–2006) active fire detections per 25-mm precipitation (PPT) bins for corresponding months (a and b) or average precipitation over the month when active fires were detected and the previous month (c and d) for Borneo (a and c) and Sumatra (b and d). Precipitation rates were derived from TRMM (14).

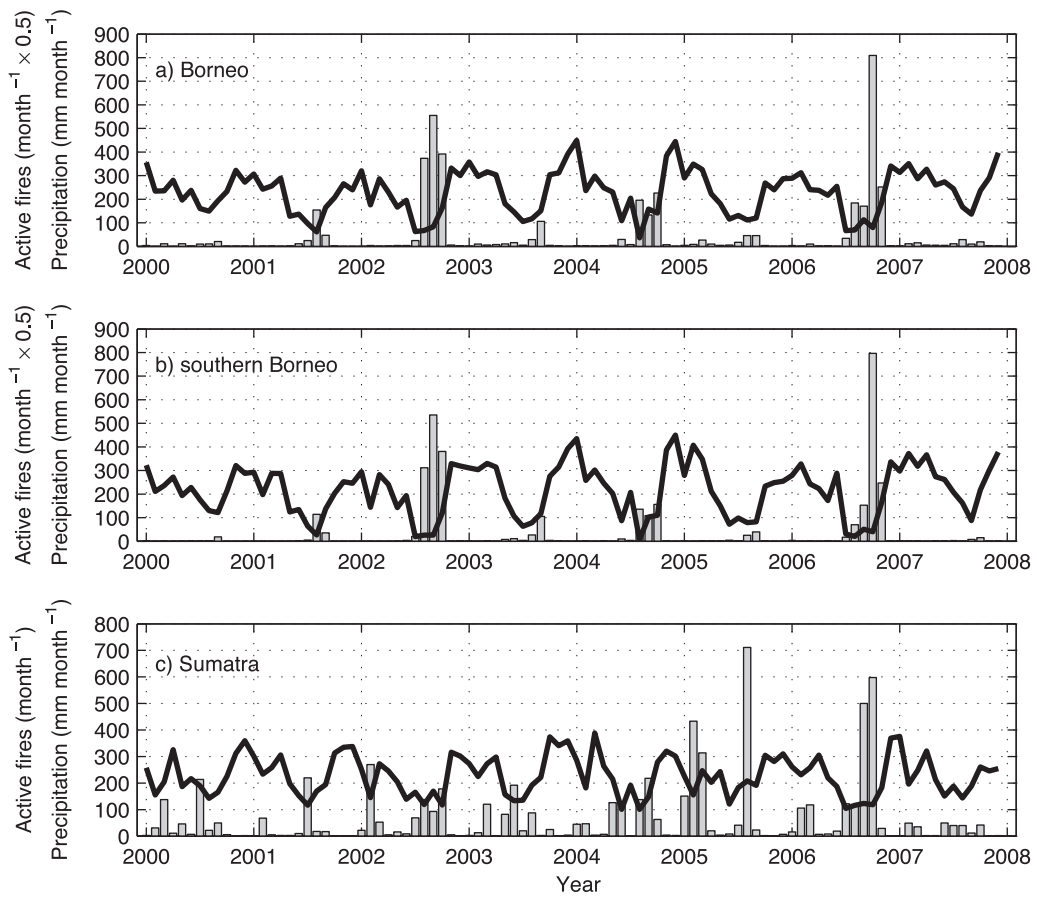

**Fig. 53.** TRMM precipitation (solid line) and (A)ATSR active fire detections (bars) for (a) all of Borneo, (b) Borneo south of 1°S, and (c) all of Sumatra. Due to La Niña conditions in 2007, average precipitation rates during the fire season did not drop below 100 mm month<sup>-1</sup> and the number of active fire detections was limited compared to other years.

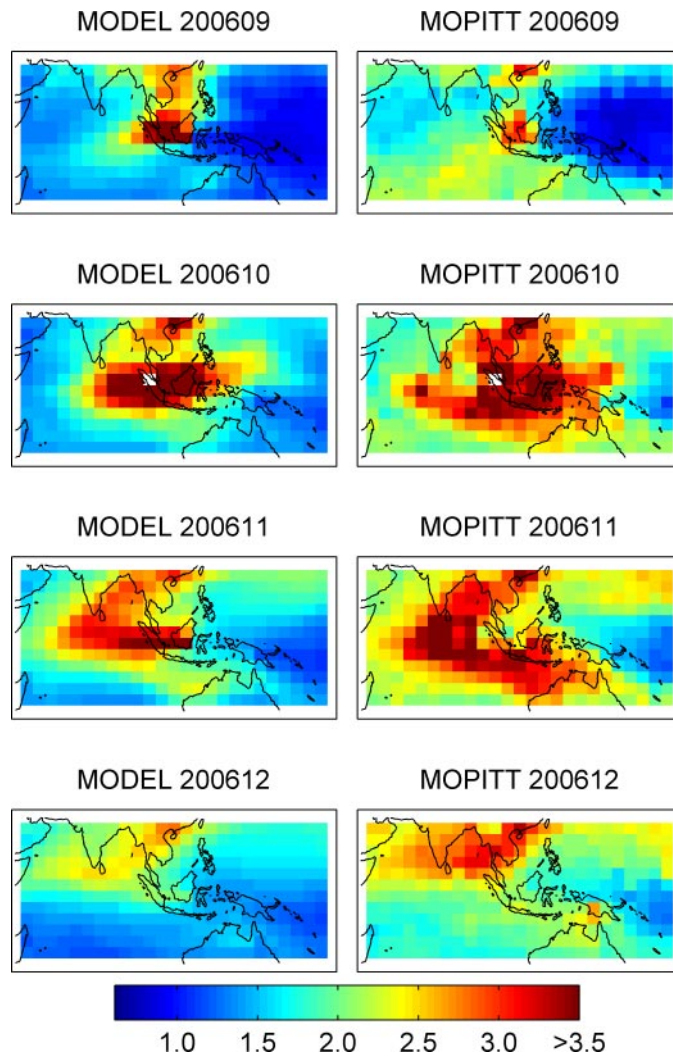

**Fig. 54.** Evolution of modeled and MOPITT measured CO mixing ratios ( $\times 10^{18}$  molecules  $\text{cm}^{-2}$ ) emissions during September–December 2006, the time period of extensive burning in Borneo. Modeled CO mixing ratios were based on all bottom-up modeled sources, including fossil fuel emissions, oxidation of  $\text{CH}_4$  and VOCs, contributions from fires outside the study region, and the local fires that elevated CO mixing ratios during the time period shown.

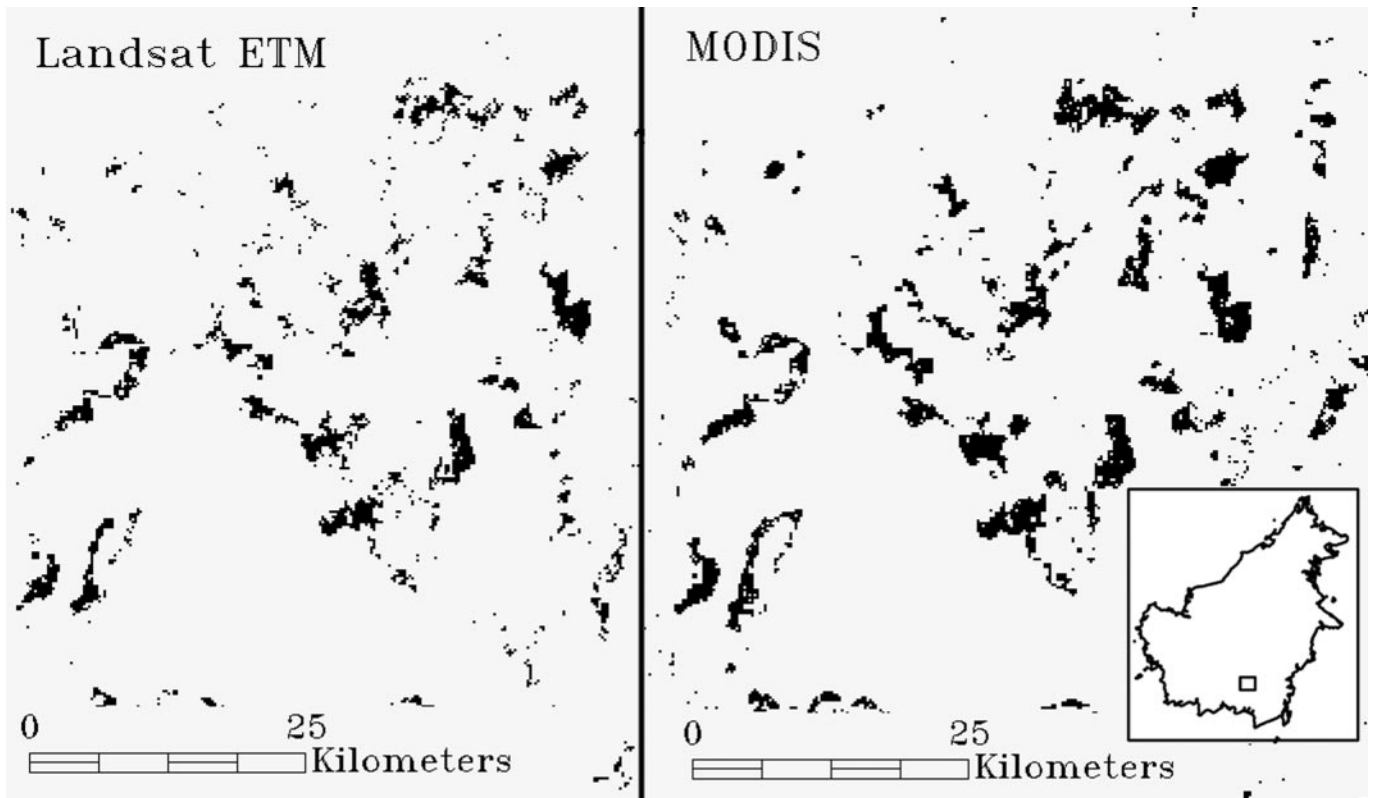

Fig. 55. Spatial patterns of deforested areas detected using Landsat ETM data (left) and MODIS data (right) for corresponding time periods in 2002. The omission error was 21.0% and the commission error was 23.1%.

**Table S1. Borneo bottom-up CO emissions, number of active fires detections, emission factors, bottom-up C emissions, and optimized C emissions**

|                                                                            | Year      |          |        |          |          |          |          |          |          |           | Average   |           |
|----------------------------------------------------------------------------|-----------|----------|--------|----------|----------|----------|----------|----------|----------|-----------|-----------|-----------|
|                                                                            | 1997      | 1998     | 1999   | 2000     | 2001     | 2002     | 2003     | 2004     | 2005     | 2006      | 2000–2006 | 1997–2006 |
| GFED CO emissions (Tg CO year <sup>-1</sup> )                              | 128       | 65       | 5      | 3        | 9        | 38       | 9        | 20       | 10       | 71        | 23        | 36        |
| Terra-MODIS fire detections                                                |           |          |        | 3,301    | 9,337    | 30,080   | 8,389    | 19,205   | 8,564    | 34,608    | 16,212    |           |
| Fraction peat emissions* (–)                                               |           |          |        | 0.39     | 0.53     | 0.40     | 0.46     | 0.39     | 0.44     | 0.35      | 0.42      |           |
| Fraction forest emissions* (–)                                             |           |          |        | 0.17     | 0.18     | 0.34     | 0.22     | 0.25     | 0.20     | 0.46      | 0.26      |           |
| Fraction other emissions* (–)                                              |           |          |        | 0.44     | 0.29     | 0.26     | 0.32     | 0.37     | 0.36     | 0.19      | 0.32      |           |
| CO emission factor (g CO kg <sup>-1</sup> DM <sup>-1</sup> ) <sup>†‡</sup> |           |          |        | 128 ± 28 | 149 ± 31 | 137 ± 28 | 140 ± 29 | 131 ± 28 | 137 ± 29 | 133 ± 27  | 136 ± 28  |           |
| Fraction peat emissions <sup>‡</sup> (–)                                   |           |          |        | 0.68     | 0.78     | 0.65     | 0.72     | 0.66     | 0.71     | 0.58      | 0.68      |           |
| Fraction forest emissions <sup>‡</sup> (–)                                 |           |          |        | 0.13     | 0.12     | 0.24     | 0.15     | 0.19     | 0.14     | 0.34      | 0.19      |           |
| Fraction other emissions <sup>‡</sup> (–)                                  |           |          |        | 0.19     | 0.11     | 0.11     | 0.13     | 0.16     | 0.14     | 0.08      | 0.13      |           |
| CO emission factor (g CO kg <sup>-1</sup> DM <sup>-1</sup> ) <sup>†‡</sup> |           |          |        | 168 ± 34 | 182 ± 36 | 169 ± 33 | 176 ± 34 | 168 ± 33 | 174 ± 34 | 163 ± 32  | 171 ± 34  |           |
| Combined EF (g CO kg <sup>-1</sup> DM <sup>-1</sup> ) <sup>§</sup>         |           |          |        | 148 ± 44 | 166 ± 47 | 153 ± 43 | 158 ± 45 | 149 ± 43 | 155 ± 45 | 148 ± 42  | 154 ± 44  |           |
| Carbon emissions (Tg C year <sup>-1</sup> ) <sup>  </sup>                  | 408 ± 117 | 206 ± 59 | 15 ± 4 | 8 ± 2    | 27 ± 8   | 123 ± 35 | 28 ± 8   | 66 ± 19  | 32 ± 9   | 234 ± 66  | 74 ± 21   | 115 ± 33  |
| Anomaly optimized + mean (Tg C year <sup>-1</sup> ) <sup>  </sup>          | 413 ± 187 | 208 ± 95 | 15 ± 7 | 7 ± 3    | 27 ± 12  | 123 ± 56 | 27 ± 12  | 66 ± 30  | 31 ± 14  | 236 ± 106 | 74 ± 33   | 115 ± 52  |
| Absolute optimization (Tg C year <sup>-1</sup> ) <sup>  </sup>             | 448 ± 180 | 226 ± 91 | 17 ± 7 | 9 ± 4    | 30 ± 12  | 135 ± 54 | 30 ± 12  | 72 ± 29  | 35 ± 14  | 257 ± 102 | 81 ± 32   | 126 ± 51  |

\*Assuming each active fire detected represented an equal amount of carbon emissions.

<sup>†</sup>Based on emission factors of 210 ± 40, 104 ± 20, and 65 ± 20 for peat fires, deforestation fires, and other fires, respectively (19, 31).

<sup>‡</sup>Assuming each active fire detected burned the same area.

<sup>§</sup>Based on the mean of the two scenarios, with the standard deviations in quadrature.

<sup>||</sup>Scalars for 1997–1999 taken from the average of 2000–2006.

<sup>||</sup>Based on a carbon content of dry matter of 49% (31).

**Table S2. Sumatra bottom-up CO emissions, number of active fire detections, emission factors, bottom-up C emissions, and optimized C emissions**

|                                                                            | Year     |         |         |          |          |          |          |          |          |          | Average   |           |
|----------------------------------------------------------------------------|----------|---------|---------|----------|----------|----------|----------|----------|----------|----------|-----------|-----------|
|                                                                            | 1997     | 1998    | 1999    | 2000     | 2001     | 2002     | 2003     | 2004     | 2005     | 2006     | 2000–2006 | 1997–2006 |
| GFED CO emissions (Tg CO year <sup>-1</sup> )                              | 58       | 5       | 9       | 8        | 1        | 15       | 10       | 16       | 44       | 25       | 17        | 19        |
| Terra-MODIS fire detections                                                |          |         |         | 11,863   | 6,189    | 16,174   | 10,443   | 14,962   | 25,543   | 27,318   | 16,070    |           |
| Fraction peat emissions* (–)                                               |          |         |         | 0.42     | 0.45     | 0.59     | 0.56     | 0.61     | 0.7      | 0.54     | 0.55      |           |
| Fraction forest emissions* (–)                                             |          |         |         | 0.11     | 0.14     | 0.13     | 0.12     | 0.13     | 0.08     | 0.27     | 0.14      |           |
| Fraction other emissions* (–)                                              |          |         |         | 0.47     | 0.41     | 0.28     | 0.32     | 0.26     | 0.21     | 0.19     | 0.31      |           |
| CO Emission factor (g CO kg <sup>-1</sup> DM <sup>-1</sup> ) <sup>†*</sup> |          |         |         | 130 ± 28 | 136 ± 29 | 156 ± 32 | 150 ± 31 | 158 ± 32 | 170 ± 34 | 154 ± 31 | 151 ± 31  |           |
| Fraction peat emissions <sup>‡</sup> (–)                                   |          |         |         | 0.71     | 0.73     | 0.82     | 0.81     | 0.83     | 0.89     | 0.76     | 0.79      |           |
| Fraction forest emissions <sup>‡</sup> (–)                                 |          |         |         | 0.08     | 0.1      | 0.08     | 0.08     | 0.08     | 0.04     | 0.17     | 0.09      |           |
| Fraction other emissions <sup>‡</sup> (–)                                  |          |         |         | 0.20     | 0.17     | 0.10     | 0.12     | 0.09     | 0.07     | 0.07     | 0.12      |           |
| CO Emission factor (g CO kg <sup>-1</sup> DM <sup>-1</sup> ) <sup>†‡</sup> |          |         |         | 172 ± 34 | 175 ± 35 | 188 ± 36 | 185 ± 36 | 189 ± 37 | 195 ± 38 | 182 ± 35 | 184 ± 36  |           |
| Combined EF (g CO kg <sup>-1</sup> DM <sup>-1</sup> ) <sup>§</sup>         |          |         |         | 151 ± 45 | 155 ± 45 | 172 ± 48 | 168 ± 48 | 173 ± 49 | 183 ± 51 | 168 ± 47 | 167 ± 47  |           |
| Carbon emissions (Tg C year <sup>-1</sup> ) <sup>  </sup>                  | 170 ± 48 | 16 ± 4  | 27 ± 8  | 26 ± 8   | 4 ± 1    | 44 ± 12  | 29 ± 8   | 47 ± 13  | 118 ± 33 | 74 ± 21  | 49 ± 14   | 55 ± 16   |
| Anomaly optimized + mean (Tg C year <sup>-1</sup> ) <sup>  </sup>          | 118 ± 95 | 30 ± 24 | 36 ± 29 | 35 ± 29  | 23 ± 19  | 46 ± 37  | 38 ± 30  | 47 ± 38  | 88 ± 71  | 63 ± 50  | 49 ± 39   | 53 ± 42   |
| Absolute optimization (Tg C year <sup>-1</sup> ) <sup>  </sup>             | 40 ± 58  | 4 ± 5   | 6 ± 9   | 6 ± 9    | 1 ± 1    | 10 ± 15  | 7 ± 10   | 11 ± 16  | 28 ± 40  | 17 ± 25  | 12 ± 17   | 13 ± 19   |

\*Assuming each active fire detected represented an equal amount of carbon emissions.

<sup>†</sup>Based on emission factors of 210 ± 40, 104 ± 20, and 65 ± 20 for peat fires, deforestation fires, and other fires, respectively(19, 31).

<sup>‡</sup>Assuming each active fire detected burned the same area.

<sup>§</sup>Based on the mean of the two scenarios, with the standard deviations in quadrature.

<sup>||</sup>Scalars for 1997–1999 taken from the average of 2000–2006.

<sup>||</sup>Based on a carbon content of dry matter of 49% (31).

**Table S3. Regression statistics and scalars for the two optimizations for different spatial domains**

| Index             | Region*  |              | Multiple linear regression scalars |       |           |                                   |       |           |                                   |             |                                           |             |             |  |
|-------------------|----------|--------------|------------------------------------|-------|-----------|-----------------------------------|-------|-----------|-----------------------------------|-------------|-------------------------------------------|-------------|-------------|--|
|                   |          |              | Spatial correlation <sup>†</sup>   |       |           | Temporal correlation <sup>‡</sup> |       |           | Anomaly optimization <sup>§</sup> |             | Absolute values optimization <sup>¶</sup> |             |             |  |
|                   | Latitude | Longitude    | R <sup>2</sup>                     | Slope | Intercept | R <sup>2</sup>                    | Slope | Intercept | Sumatra                           | Borneo      | ROTW <sup>¶</sup>                         | Sumatra     | Borneo      |  |
| 1                 | 4N–4S    | 82.5E–122.5E | 0.62                               | 0.91  | 0.10      | 0.88                              | 0.98  | 0.04      | 0.45 ± 0.18                       | 0.65 ± 0.11 | 1.10 ± 0.02                               | 0.25 ± 0.16 | 0.74 ± 0.09 |  |
| 2                 | 4N–4S    | 77.5E–127.5E | 0.65                               | 0.90  | 0.14      | 0.89                              | 0.98  | 0.05      | 0.47 ± 0.20                       | 0.72 ± 0.12 | 1.10 ± 0.02                               | 0.25 ± 0.17 | 0.81 ± 0.10 |  |
| 3                 | 8N–8S    | 77.5E–127.5E | 0.72                               | 0.93  | 0.08      | 0.90                              | 1.00  | 0.00      | 0.52 ± 0.24                       | 0.87 ± 0.15 | 1.10 ± 0.02                               | 0.24 ± 0.21 | 0.95 ± 0.12 |  |
| 4                 | 8N–8S    | 72.5E–132.5E | 0.72                               | 0.93  | 0.09      | 0.90                              | 1.00  | 0.00      | 0.52 ± 0.26                       | 0.92 ± 0.16 | 1.10 ± 0.02                               | 0.24 ± 0.23 | 1.00 ± 0.13 |  |
| 5                 | 12N–12S  | 67.5E–137.5E | 0.72                               | 0.92  | 0.12      | 0.89                              | 1.01  | −0.02     | 0.59 ± 0.33                       | 1.06 ± 0.20 | 1.10 ± 0.02                               | 0.24 ± 0.29 | 1.13 ± 0.16 |  |
| 6                 | 12N–12S  | 62.5E–142.5E | 0.73                               | 0.92  | 0.12      | 0.89                              | 1.01  | −0.01     | 0.61 ± 0.35                       | 1.09 ± 0.21 | 1.10 ± 0.02                               | 0.24 ± 0.31 | 1.18 ± 0.17 |  |
| 7                 | 12N–12S  | 57.5E–147.5E | 0.73                               | 0.93  | 0.11      | 0.88                              | 1.00  | 0.00      | 0.62 ± 0.38                       | 1.12 ± 0.23 | 1.10 ± 0.02                               | 0.23 ± 0.33 | 1.22 ± 0.18 |  |
| 8                 | 16N–16S  | 57.5E–147.5E | 0.73                               | 0.91  | 0.15      | 0.87                              | 0.99  | 0.01      | 0.68 ± 0.43                       | 1.17 ± 0.26 | 1.10 ± 0.02                               | 0.22 ± 0.38 | 1.28 ± 0.20 |  |
| 9                 | 16N–16S  | 52.5E–152.5E | 0.71                               | 0.90  | 0.16      | 0.86                              | 0.99  | 0.02      | 0.69 ± 0.46                       | 1.19 ± 0.28 | 1.10 ± 0.02                               | 0.21 ± 0.39 | 1.32 ± 0.21 |  |
| 10                | 16N–16S  | 47.5E–157.5E | 0.71                               | 0.91  | 0.15      | 0.85                              | 0.98  | 0.03      | 0.70 ± 0.49                       | 1.19 ± 0.29 | 1.11 ± 0.02                               | 0.19 ± 0.43 | 1.35 ± 0.23 |  |
| 11                | 20N–20S  | 47.5E–157.5E | 0.71                               | 0.86  | 0.24      | 0.83                              | 0.97  | 0.06      | 0.77 ± 0.56                       | 1.22 ± 0.32 | 1.11 ± 0.02                               | 0.20 ± 0.48 | 1.40 ± 0.25 |  |
| 12                | 20N–20S  | 42.5E–162.5E | 0.70                               | 0.86  | 0.24      | 0.82                              | 0.96  | 0.07      | 0.78 ± 0.58                       | 1.22 ± 0.34 | 1.12 ± 0.02                               | 0.19 ± 0.49 | 1.44 ± 0.26 |  |
| 13                | 24N–24S  | 37.5E–167.5E | 0.71                               | 0.86  | 0.24      | 0.79                              | 0.94  | 0.11      | 0.85 ± 0.68                       | 1.22 ± 0.39 | 1.12 ± 0.02                               | 0.22 ± 0.59 | 1.51 ± 0.30 |  |
| 3–7 <sup>  </sup> |          |              |                                    |       |           |                                   |       |           | 0.57 ± 0.43                       | 1.01 ± 0.36 | 1.10 ± 0.02                               | 0.24 ± 0.34 | 1.10 ± 0.31 |  |

\*Different box sizes used.

<sup>†</sup>Regression values based on the mean monthly values.

<sup>‡</sup>Regression values based on all grid cell values for months where the combined fire CO emissions from Sumatra and Borneo exceeded  $0.1 \times 10^{18}$  molecules  $\text{cm}^{-2}$ .

<sup>§</sup>Optimization where fire emissions anomalies from Sumatra and Borneo were optimized to match MOPITT anomalies.

<sup>¶</sup>Optimization on absolute values, where Sumatra, Borneo, and the rest of the world (ROTW, which includes biomass burning emissions from outside equatorial Asia, fossil fuel and biofuel emissions, and methane and biogenic VOC oxidation) were adjusted to reach an optimum fit with MOPITT data.

<sup>||</sup>Regions 3–7 yielded the highest correlation when taking both the spatial and the temporal correlation into account. The average scalar of these boxes was used to estimate emissions, and a subjective estimate of the standard deviations was taken as the maximum standard deviation for regions 3–7 added onto half the range of the scalars for regions 3–7 so that regions with scalars that departed from the mean fell within the standard deviation.



**Table S4. Summary of annual emission estimates (Tg C year<sup>-1</sup>) for Sumatra, Borneo, other regions, and all regions combined for three different approaches**

| Approach                                 | Region                    | Year      |          |         |         |         |          |         |          |          |           | Average   |           |
|------------------------------------------|---------------------------|-----------|----------|---------|---------|---------|----------|---------|----------|----------|-----------|-----------|-----------|
|                                          |                           | 1997      | 1998     | 1999    | 2000    | 2001    | 2002     | 2003    | 2004     | 2005     | 2006      | 2000–2006 | 1997–2006 |
| Bottom-up model                          | Borneo                    | 408 ± 117 | 206 ± 59 | 15 ± 4  | 8 ± 2   | 27 ± 8  | 123 ± 35 | 28 ± 8  | 66 ± 19  | 32 ± 9   | 234 ± 66  | 74 ± 21   | 115 ± 33  |
|                                          | Sumatra                   | 170 ± 48  | 16 ± 4   | 27 ± 8  | 26 ± 8  | 4 ± 1   | 44 ± 12  | 29 ± 8  | 47 ± 13  | 118 ± 33 | 74 ± 21   | 49 ± 14   | 55 ± 16   |
|                                          | Other                     | 193 ± 55  | 6 ± 2    | 3 ± 1   | 4 ± 1   | 3 ± 1   | 15 ± 4   | 2 ± 1   | 7 ± 2    | 3 ± 1    | 3 ± 1     | 5 ± 2     | 24 ± 7    |
|                                          | Whole region <sup>*</sup> | 771 ± 138 | 228 ± 59 | 46 ± 9  | 37 ± 8  | 34 ± 8  | 182 ± 37 | 59 ± 12 | 120 ± 23 | 153 ± 34 | 311 ± 69  | 128 ± 25  | 194 ± 37  |
| Anomaly optimization + mean <sup>†</sup> | Borneo                    | 413 ± 187 | 208 ± 95 | 15 ± 7  | 7 ± 3   | 27 ± 12 | 123 ± 56 | 27 ± 12 | 66 ± 30  | 31 ± 14  | 236 ± 106 | 74 ± 33   | 115 ± 52  |
|                                          | Sumatra                   | 118 ± 95  | 30 ± 24  | 36 ± 29 | 35 ± 29 | 23 ± 19 | 46 ± 37  | 38 ± 30 | 47 ± 38  | 88 ± 71  | 63 ± 50   | 49 ± 39   | 53 ± 42   |
|                                          | Other                     | 195 ± 89  | 6 ± 3    | 3 ± 1   | 4 ± 2   | 3 ± 1   | 15 ± 7   | 2 ± 1   | 7 ± 3    | 3 ± 2    | 3 ± 1     | 5 ± 2     | 24 ± 11   |
|                                          | Whole region <sup>*</sup> | 726 ± 228 | 244 ± 98 | 54 ± 30 | 47 ± 29 | 53 ± 22 | 185 ± 67 | 67 ± 33 | 120 ± 49 | 123 ± 72 | 303 ± 118 | 128 ± 51  | 192 ± 68  |
| Absolute optimization                    | Borneo                    | 448 ± 180 | 226 ± 91 | 17 ± 7  | 9 ± 4   | 30 ± 12 | 135 ± 54 | 30 ± 12 | 72 ± 29  | 35 ± 14  | 257 ± 102 | 81 ± 32   | 126 ± 51  |
|                                          | Sumatra                   | 40 ± 58   | 4 ± 5    | 6 ± 9   | 6 ± 9   | 1 ± 1   | 10 ± 15  | 7 ± 10  | 11 ± 16  | 28 ± 40  | 17 ± 25   | 12 ± 17   | 13 ± 19   |
|                                          | Other                     | 211 ± 85  | 6 ± 3    | 3 ± 1   | 4 ± 2   | 3 ± 1   | 16 ± 7   | 2 ± 1   | 8 ± 3    | 4 ± 2    | 4 ± 1     | 6 ± 2     | 26 ± 11   |
|                                          | Whole region <sup>*</sup> | 699 ± 207 | 236 ± 91 | 27 ± 12 | 19 ± 10 | 34 ± 12 | 162 ± 56 | 40 ± 16 | 91 ± 33  | 66 ± 43  | 278 ± 105 | 99 ± 37   | 165 ± 55  |

<sup>\*</sup>Standard deviations calculated in quadrature.

<sup>†</sup>Mean from bottom-up model.
